# Supplementary material
Source: publisher site journal article supplement (https://www.dovepress.com/get_supplementary_file.php?f=321319.docx)
Supplement: Supplementary file 1 [file get_supplementary_file.php]

**Supplementary Table 1** 94 differential genes that were significantly associated with RFS of PCa patients.

| Genes | HR | HR.95L | HR.95H | *P*-value |
| --- | --- | --- | --- | --- |
| CLEC7A | 1.695 | 1.355 | 2.119 | 3.82E-06 |
| COL11A1 | 1.277 | 1.15 | 1.418 | 4.87E-06 |
| THBS2 | 1.423 | 1.214 | 1.669 | 1.40E-05 |
| PTGIR | 1.571 | 1.279 | 1.928 | 1.64E-05 |
| FCGR2B | 1.49 | 1.23 | 1.804 | 4.51E-05 |
| FPR3 | 1.493 | 1.222 | 1.826 | 9.10E-05 |
| ADAM12 | 1.417 | 1.189 | 1.688 | 9.63E-05 |
| THEMIS2 | 1.566 | 1.249 | 1.964 | 0.000102 |
| OLR1 | 1.395 | 1.176 | 1.655 | 0.000135 |
| LILRB2 | 1.516 | 1.222 | 1.88 | 0.000156 |
| FGD2 | 1.479 | 1.2 | 1.824 | 0.00025 |
| CSF3R | 1.531 | 1.218 | 1.925 | 0.000264 |
| CERKL | 1.461 | 1.187 | 1.797 | 0.000341 |
| CD86 | 1.49 | 1.195 | 1.857 | 0.000394 |
| NCF1 | 1.443 | 1.175 | 1.771 | 0.000459 |
| SFRP4 | 1.306 | 1.125 | 1.516 | 0.000465 |
| COMP | 1.239 | 1.098 | 1.399 | 0.000526 |
| GPNMB | 1.412 | 1.156 | 1.724 | 0.000721 |
| KLHL6 | 1.361 | 1.137 | 1.628 | 0.000785 |
| MYBPC3 | 1.262 | 1.101 | 1.447 | 0.00082 |
| IL2RA | 1.324 | 1.121 | 1.565 | 0.000985 |
| TREM1 | 1.313 | 1.112 | 1.551 | 0.001347 |
| IL10RA | 1.406 | 1.14 | 1.733 | 0.001427 |
| CD163 | 1.341 | 1.118 | 1.609 | 0.001603 |
| ITGAM | 1.448 | 1.15 | 1.823 | 0.001632 |
| LAIR1 | 1.48 | 1.155 | 1.895 | 0.001904 |
| CLDN18 | 1.302 | 1.102 | 1.539 | 0.001946 |
| BTK | 1.423 | 1.138 | 1.78 | 0.002012 |
| C3AR1 | 1.449 | 1.144 | 1.834 | 0.002104 |
| LILRB1 | 1.38 | 1.123 | 1.694 | 0.002142 |
| TLR6 | 1.376 | 1.118 | 1.694 | 0.002636 |
| CD84 | 1.307 | 1.097 | 1.557 | 0.00276 |
| CD200R1 | 1.313 | 1.098 | 1.571 | 0.002805 |
| HLA-DQA1 | 1.348 | 1.102 | 1.649 | 0.003625 |
| CSF2RA | 1.399 | 1.113 | 1.759 | 0.004028 |
| DOCK10 | 1.31 | 1.09 | 1.574 | 0.004029 |
| CSF2RB | 1.282 | 1.076 | 1.527 | 0.005395 |
| TNFSF13B | 1.343 | 1.09 | 1.654 | 0.005567 |
| ADAMDEC1 | 1.214 | 1.057 | 1.394 | 0.006156 |
| DOCK2 | 1.297 | 1.077 | 1.563 | 0.006179 |
| CCR1 | 1.312 | 1.079 | 1.596 | 0.006599 |
| CD37 | 1.315 | 1.079 | 1.603 | 0.00671 |
| GPR65 | 1.35 | 1.086 | 1.676 | 0.006745 |
| RNASE2 | 1.303 | 1.075 | 1.58 | 0.006956 |
| IL12B | 1.234 | 1.057 | 1.44 | 0.00793 |
| PTPN22 | 1.271 | 1.064 | 1.517 | 0.008027 |
| HAPLN3 | 1.312 | 1.072 | 1.607 | 0.008496 |
| ITGA4 | 1.215 | 1.048 | 1.408 | 0.009678 |
| CD53 | 1.323 | 1.069 | 1.637 | 0.010004 |
| CD4 | 1.315 | 1.066 | 1.624 | 0.010742 |
| FPR1 | 1.262 | 1.055 | 1.51 | 0.010916 |
| IL21R | 1.24 | 1.05 | 1.463 | 0.011086 |
| CCL24 | 1.181 | 1.038 | 1.342 | 0.01118 |
| CTSC | 1.373 | 1.072 | 1.759 | 0.012129 |
| IGSF10 | 1.223 | 1.045 | 1.432 | 0.012337 |
| MNDA | 1.291 | 1.054 | 1.581 | 0.013414 |
| CD180 | 1.258 | 1.045 | 1.515 | 0.015301 |
| CSF1R | 1.329 | 1.056 | 1.672 | 0.01546 |
| CTSK | 1.353 | 1.059 | 1.729 | 0.0155 |
| TLR7 | 1.242 | 1.04 | 1.483 | 0.016884 |
| SLFN12L | 1.232 | 1.038 | 1.461 | 0.017023 |
| IL12RB1 | 1.283 | 1.045 | 1.574 | 0.017169 |
| MPEG1 | 1.258 | 1.039 | 1.523 | 0.018927 |
| CYBB | 1.242 | 1.036 | 1.488 | 0.019046 |
| CARD11 | 1.26 | 1.039 | 1.529 | 0.01913 |
| KYNU | 1.269 | 1.039 | 1.55 | 0.019613 |
| CCR3 | 1.249 | 1.035 | 1.508 | 0.020226 |
| LCP2 | 1.295 | 1.038 | 1.617 | 0.022107 |
| TNFSF8 | 1.221 | 1.029 | 1.448 | 0.022336 |
| TLR2 | 1.281 | 1.036 | 1.585 | 0.022349 |
| PCDH17 | 1.169 | 1.022 | 1.336 | 0.022444 |
| SELPLG | 1.286 | 1.034 | 1.6 | 0.023581 |
| CTSS | 1.269 | 1.032 | 1.561 | 0.023905 |
| TNFAIP6 | 1.219 | 1.025 | 1.45 | 0.024914 |
| IL16 | 1.269 | 1.03 | 1.563 | 0.024939 |
| PLEK | 1.246 | 1.028 | 1.511 | 0.025336 |
| TNFRSF1B | 1.324 | 1.034 | 1.695 | 0.026298 |
| GDF3 | 1.227 | 1.024 | 1.47 | 0.02634 |
| HCK | 1.288 | 1.028 | 1.615 | 0.027878 |
| LAX1 | 1.179 | 1.016 | 1.369 | 0.030399 |
| CSF3 | 0.904 | 0.824 | 0.992 | 0.033879 |
| GAPT | 1.24 | 1.015 | 1.516 | 0.035125 |
| SFRP2 | 1.21 | 1.012 | 1.445 | 0.036307 |
| TLR8 | 1.18 | 1.008 | 1.382 | 0.039699 |
| LILRA1 | 1.233 | 1.01 | 1.506 | 0.039999 |
| GBX2 | 1.184 | 1.007 | 1.391 | 0.040362 |
| MAL | 0.868 | 0.757 | 0.994 | 0.041203 |
| PCSK9 | 1.169 | 1.005 | 1.358 | 0.042238 |
| CXCR4 | 1.225 | 1.003 | 1.495 | 0.046272 |
| LEP | 1.204 | 1.003 | 1.446 | 0.046466 |
| PTPRC | 1.171 | 1.001 | 1.37 | 0.047992 |
| NLRP3 | 1.221 | 1.002 | 1.488 | 0.048275 |
| JAK3 | 1.222 | 1.001 | 1.491 | 0.048552 |
| SST | 1.11 | 1 | 1.231 | 0.049304 |

**Supplementary Table 2** The risk scores of PCa samples.

| Samples | Risk score | Samples | Risk score |
| --- | --- | --- | --- |
| TCGA-VN-A943 | 0.09889303 | TCGA-HC-8262 | 1.0164343 |
| TCGA-HC-7752 | 0.1570232 | TCGA-FC-A66V | 1.01651017 |
| TCGA-M7-A71Z | 0.16566345 | TCGA-M7-A720 | 1.01831381 |
| TCGA-HC-A6AQ | 0.22548853 | TCGA-EJ-7218 | 1.01865607 |
| TCGA-FC-A6HD | 0.2287531 | TCGA-KK-A8ID | 1.02164507 |
| TCGA-HC-8213 | 0.23981806 | TCGA-2A-AAYO | 1.03454802 |
| TCGA-HI-7169 | 0.23998178 | TCGA-G9-6365 | 1.03883036 |
| TCGA-EJ-A46B | 0.25688164 | TCGA-KK-A6E0 | 1.04226576 |
| TCGA-VN-A88M | 0.25977679 | TCGA-VP-A87H | 1.04274976 |
| TCGA-J4-A67O | 0.26144769 | TCGA-XQ-A8TA | 1.04616848 |
| TCGA-KC-A4BN | 0.26144769 | TCGA-HC-A6AN | 1.04798205 |
| TCGA-KK-A6E4 | 0.27003028 | TCGA-XJ-A9DK | 1.05647561 |
| TCGA-QU-A6IN | 0.27521756 | TCGA-V1-A9OH | 1.05807972 |
| TCGA-H9-A6BY | 0.28086047 | TCGA-KK-A8I6 | 1.06120661 |
| TCGA-QU-A6IL | 0.28489174 | TCGA-HC-A6AL | 1.07651132 |
| TCGA-HC-7750 | 0.28494547 | TCGA-ZG-A8QW | 1.08243554 |
| TCGA-XJ-A83G | 0.28963894 | TCGA-M7-A721 | 1.08593559 |
| TCGA-CH-5772 | 0.2920654 | TCGA-J4-A6G1 | 1.08781264 |
| TCGA-2A-A8VL | 0.29642349 | TCGA-KK-A7AP | 1.10167577 |
| TCGA-M7-A724 | 0.29690545 | TCGA-HC-7080 | 1.10544759 |
| TCGA-G9-6332 | 0.30801378 | TCGA-EJ-A7NK | 1.10902544 |
| TCGA-EJ-A7NF | 0.30922294 | TCGA-M7-A723 | 1.11196876 |
| TCGA-G9-6343 | 0.31058666 | TCGA-EJ-5506 | 1.11680549 |
| TCGA-ZG-A9N3 | 0.31433955 | TCGA-V1-A9ZK | 1.11692444 |
| TCGA-HC-8259 | 0.31521214 | TCGA-EJ-5494 | 1.12168386 |
| TCGA-J4-A6M7 | 0.32745747 | TCGA-CH-5762 | 1.12398548 |
| TCGA-XK-AAK1 | 0.32978787 | TCGA-KK-A7AV | 1.12672158 |
| TCGA-KK-A7AW | 0.33114803 | TCGA-EJ-5503 | 1.13500335 |
| TCGA-HC-A6HY | 0.33486865 | TCGA-EJ-7783 | 1.13614437 |
| TCGA-G9-7509 | 0.33861699 | TCGA-HC-7231 | 1.13755039 |
| TCGA-G9-6371 | 0.34353751 | TCGA-XJ-A9DX | 1.14052932 |
| TCGA-EJ-7325 | 0.35336088 | TCGA-KC-A7FE | 1.14175995 |
| TCGA-VP-A876 | 0.35336088 | TCGA-V1-A8X3 | 1.14595703 |
| TCGA-MG-AAMC | 0.35659613 | TCGA-CH-5766 | 1.14612229 |
| TCGA-EJ-5496 | 0.36341102 | TCGA-H9-7775 | 1.14648853 |
| TCGA-G9-6498 | 0.37620437 | TCGA-V1-A8WN | 1.14716036 |
| TCGA-G9-6353 | 0.37675037 | TCGA-KK-A8I5 | 1.14717488 |
| TCGA-J4-AAU2 | 0.37989741 | TCGA-HC-7740 | 1.15145641 |
| TCGA-V1-A9OT | 0.38133479 | TCGA-VN-A88P | 1.15397503 |
| TCGA-EJ-7793 | 0.38349046 | TCGA-KK-A6DY | 1.15614276 |
| TCGA-G9-6339 | 0.38349046 | TCGA-G9-6348 | 1.15783071 |
| TCGA-HC-8256 | 0.3857502 | TCGA-EJ-8469 | 1.15929782 |
| TCGA-KC-A7FD | 0.39338714 | TCGA-YL-A8SO | 1.16173083 |
| TCGA-EJ-A46F | 0.39365717 | TCGA-J4-8198 | 1.17410954 |
| TCGA-G9-6351 | 0.39487213 | TCGA-M7-A725 | 1.18178176 |
| TCGA-KK-A7AU | 0.3960533 | TCGA-EJ-8468 | 1.19265741 |
| TCGA-G9-6362 | 0.39891061 | TCGA-G9-6361 | 1.19394825 |
| TCGA-G9-6354 | 0.40215018 | TCGA-EJ-5542 | 1.20027771 |
| TCGA-EJ-A65G | 0.40311965 | TCGA-KK-A6E6 | 1.2101205 |
| TCGA-ZG-A9LU | 0.40765257 | TCGA-EJ-A8FU | 1.21044524 |
| TCGA-J4-A83N | 0.4090546 | TCGA-HC-A631 | 1.21177909 |
| TCGA-HC-7738 | 0.41135747 | TCGA-VN-A88I | 1.21198503 |
| TCGA-G9-6367 | 0.41151417 | TCGA-EJ-5530 | 1.21297541 |
| TCGA-HC-7744 | 0.41676847 | TCGA-YL-A8SP | 1.21527584 |
| TCGA-KK-A8IF | 0.4304227 | TCGA-EJ-7115 | 1.21614229 |
| TCGA-XJ-A9DQ | 0.43464347 | TCGA-HC-A8D1 | 1.22545968 |
| TCGA-G9-6342 | 0.43792123 | TCGA-G9-6373 | 1.2260675 |
| TCGA-G9-6336 | 0.44057871 | TCGA-VP-A87B | 1.23640893 |
| TCGA-G9-A9S7 | 0.44057871 | TCGA-KC-A4BR | 1.23724669 |
| TCGA-EJ-5505 | 0.44157924 | TCGA-J4-A67M | 1.2419919 |
| TCGA-KK-A59Y | 0.44198551 | TCGA-HC-7737 | 1.24652078 |
| TCGA-YL-A8SA | 0.44357185 | TCGA-J4-A83L | 1.24983598 |
| TCGA-G9-7519 | 0.44375575 | TCGA-HC-A48F | 1.25085763 |
| TCGA-2A-A8VV | 0.44771399 | TCGA-VN-A88K | 1.25121831 |
| TCGA-HC-7075 | 0.45610649 | TCGA-VP-A878 | 1.26561612 |
| TCGA-HC-7820 | 0.45610649 | TCGA-CH-5753 | 1.27547567 |
| TCGA-X4-A8KS | 0.45610649 | TCGA-EJ-7781 | 1.28188221 |
| TCGA-HC-7077 | 0.45652806 | TCGA-VN-A88L | 1.28363891 |
| TCGA-Y6-A9XI | 0.45840901 | TCGA-ZG-A9L4 | 1.28890664 |
| TCGA-QU-A6IM | 0.45852541 | TCGA-KK-A8IB | 1.29288224 |
| TCGA-XJ-A83H | 0.46643375 | TCGA-XK-AAJR | 1.29411178 |
| TCGA-J4-A67K | 0.46680136 | TCGA-G9-6384 | 1.29422829 |
| TCGA-QU-A6IP | 0.46732406 | TCGA-J4-AATV | 1.30331123 |
| TCGA-FC-A8O0 | 0.47384085 | TCGA-EJ-5504 | 1.31921045 |
| TCGA-EJ-7321 | 0.47420427 | TCGA-2A-A8W3 | 1.33008719 |
| TCGA-KK-A6E3 | 0.47733442 | TCGA-EJ-A46E | 1.33718586 |
| TCGA-CH-5741 | 0.48012607 | TCGA-ZG-A9L5 | 1.33740535 |
| TCGA-V1-A9Z9 | 0.48497475 | TCGA-V1-A8MF | 1.34161489 |
| TCGA-Y6-A8TL | 0.49089111 | TCGA-CH-5744 | 1.34572851 |
| TCGA-ZG-A9LB | 0.49728521 | TCGA-HC-7211 | 1.34633749 |
| TCGA-KK-A8IK | 0.50262301 | TCGA-J9-A8CM | 1.35036616 |
| TCGA-CH-5748 | 0.50472687 | TCGA-J4-A6G3 | 1.35319457 |
| TCGA-EJ-5512 | 0.50523859 | TCGA-EJ-7784 | 1.360619 |
| TCGA-KK-A6E2 | 0.50710083 | TCGA-HC-A76W | 1.37000281 |
| TCGA-ZG-A9ND | 0.51277703 | TCGA-XJ-A9DI | 1.37789118 |
| TCGA-EJ-7317 | 0.51285627 | TCGA-V1-A9ZI | 1.37955722 |
| TCGA-KK-A8I8 | 0.51289746 | TCGA-G9-7510 | 1.38379506 |
| TCGA-V1-A8WS | 0.51726502 | TCGA-EJ-7788 | 1.38559881 |
| TCGA-G9-6494 | 0.51760698 | TCGA-YL-A8SH | 1.40031767 |
| TCGA-G9-A9S4 | 0.51909236 | TCGA-HC-A6AS | 1.4003997 |
| TCGA-EJ-AB20 | 0.5203783 | TCGA-XK-AAJ3 | 1.40185935 |
| TCGA-V1-A9OQ | 0.52523665 | TCGA-J9-A52B | 1.41099129 |
| TCGA-EJ-7314 | 0.52551678 | TCGA-CH-5794 | 1.41786774 |
| TCGA-M7-A722 | 0.52898564 | TCGA-HC-8261 | 1.42490192 |
| TCGA-2A-A8W1 | 0.5301839 | TCGA-CH-5763 | 1.43289116 |
| TCGA-KC-A7F5 | 0.53228774 | TCGA-HI-7168 | 1.43575499 |
| TCGA-KK-A7AY | 0.53447532 | TCGA-YL-A8SK | 1.43829374 |
| TCGA-VN-A88Q | 0.53773641 | TCGA-YL-A8SJ | 1.44033753 |
| TCGA-V1-A8MK | 0.5420174 | TCGA-V1-A9O9 | 1.4433724 |
| TCGA-EJ-7123 | 0.542166 | TCGA-KK-A8IL | 1.45239916 |
| TCGA-CH-5746 | 0.54396276 | TCGA-EJ-8472 | 1.46656588 |
| TCGA-G9-6377 | 0.54489196 | TCGA-KK-A8IH | 1.4699184 |
| TCGA-XJ-A83F | 0.54968201 | TCGA-HC-A8CY | 1.47002731 |
| TCGA-XK-AAJU | 0.55538877 | TCGA-EJ-5501 | 1.47262293 |
| TCGA-HC-7819 | 0.5577499 | TCGA-XK-AAJA | 1.49124805 |
| TCGA-HC-A6AO | 0.56379571 | TCGA-XK-AAIW | 1.50839682 |
| TCGA-EJ-7312 | 0.56671169 | TCGA-KK-A8IM | 1.51217811 |
| TCGA-G9-6385 | 0.56703098 | TCGA-EJ-A6RC | 1.51378674 |
| TCGA-CH-5764 | 0.56724377 | TCGA-EJ-7794 | 1.51544328 |
| TCGA-G9-6363 | 0.57019582 | TCGA-G9-7522 | 1.5432009 |
| TCGA-V1-A9OF | 0.57766393 | TCGA-VP-A87J | 1.54609557 |
| TCGA-EJ-A8FN | 0.58073017 | TCGA-EJ-A46H | 1.54691436 |
| TCGA-CH-5767 | 0.58078748 | TCGA-EJ-5519 | 1.55034773 |
| TCGA-G9-6378 | 0.5820119 | TCGA-KK-A7B3 | 1.55528938 |
| TCGA-EJ-A6RA | 0.5824626 | TCGA-CH-5750 | 1.57405283 |
| TCGA-KC-A7F6 | 0.59052973 | TCGA-EJ-A65J | 1.57550085 |
| TCGA-HC-A76X | 0.59836276 | TCGA-KK-A59X | 1.57786675 |
| TCGA-J4-A67T | 0.60804069 | TCGA-HC-7213 | 1.58311257 |
| TCGA-EJ-7797 | 0.60949983 | TCGA-EJ-8474 | 1.59451907 |
| TCGA-EJ-A46I | 0.61137421 | TCGA-YL-A9WK | 1.60364176 |
| TCGA-FC-A4JI | 0.61529127 | TCGA-EJ-7328 | 1.6099964 |
| TCGA-KK-A6E5 | 0.62130251 | TCGA-ZG-A9LS | 1.61513069 |
| TCGA-EJ-A65M | 0.62316724 | TCGA-EJ-A65F | 1.62937696 |
| TCGA-KK-A6E8 | 0.62709716 | TCGA-HC-7818 | 1.63070326 |
| TCGA-G9-6329 | 0.62735604 | TCGA-KK-A8IG | 1.63591024 |
| TCGA-TP-A8TV | 0.63116579 | TCGA-FC-7708 | 1.64747764 |
| TCGA-EJ-A46D | 0.63761772 | TCGA-KK-A5A1 | 1.66156872 |
| TCGA-YL-A8SL | 0.63805436 | TCGA-KK-A7B2 | 1.66395263 |
| TCGA-EJ-5517 | 0.64335149 | TCGA-YL-A8SI | 1.6692311 |
| TCGA-EJ-A65B | 0.64736186 | TCGA-ZG-A9LN | 1.6722301 |
| TCGA-G9-6379 | 0.64886548 | TCGA-KK-A8IA | 1.67448233 |
| TCGA-FC-A5OB | 0.65188516 | TCGA-HC-8258 | 1.68074955 |
| TCGA-M7-A71Y | 0.65304458 | TCGA-EJ-8470 | 1.68874288 |
| TCGA-G9-6333 | 0.66032013 | TCGA-HC-A4ZV | 1.69610643 |
| TCGA-G9-6496 | 0.66170007 | TCGA-EJ-5507 | 1.69946076 |
| TCGA-EJ-5497 | 0.66315618 | TCGA-V1-A9ZG | 1.70061997 |
| TCGA-J4-A67R | 0.66373117 | TCGA-HC-7747 | 1.70775115 |
| TCGA-KK-A7B0 | 0.6673729 | TCGA-CH-5769 | 1.7214786 |
| TCGA-J4-A67Q | 0.66786335 | TCGA-HC-7212 | 1.73264483 |
| TCGA-EJ-7125 | 0.66869561 | TCGA-CH-5743 | 1.74419216 |
| TCGA-G9-6499 | 0.67398614 | TCGA-HI-7171 | 1.74579279 |
| TCGA-CH-5790 | 0.67404349 | TCGA-EJ-5511 | 1.74879531 |
| TCGA-G9-A9S0 | 0.67552895 | TCGA-EJ-7789 | 1.74943555 |
| TCGA-HC-7230 | 0.67803054 | TCGA-V1-A8MM | 1.76953072 |
| TCGA-EJ-A65E | 0.67872205 | TCGA-KK-A7B1 | 1.77066417 |
| TCGA-XA-A8JR | 0.67956741 | TCGA-HC-8264 | 1.79312016 |
| TCGA-V1-A9OX | 0.68364893 | TCGA-V1-A9O5 | 1.79863165 |
| TCGA-HC-A6AP | 0.68523933 | TCGA-2A-A8VT | 1.80562757 |
| TCGA-KK-A7AQ | 0.69455373 | TCGA-HC-7736 | 1.80883006 |
| TCGA-WW-A8ZI | 0.69770465 | TCGA-YL-A8HO | 1.80964491 |
| TCGA-G9-6366 | 0.69878864 | TCGA-V1-A9OL | 1.82306356 |
| TCGA-ZG-A9L1 | 0.70540998 | TCGA-HC-A9TE | 1.84264917 |
| TCGA-X4-A8KQ | 0.70689938 | TCGA-YL-A9WX | 1.8504167 |
| TCGA-KC-A7FA | 0.72653091 | TCGA-J9-A8CK | 1.85891237 |
| TCGA-V1-A8WL | 0.72706813 | TCGA-CH-5745 | 1.86136244 |
| TCGA-YL-A8SQ | 0.72726944 | TCGA-EJ-5516 | 1.86815255 |
| TCGA-VP-A879 | 0.72923457 | TCGA-J4-A83I | 1.87291442 |
| TCGA-EJ-A8FS | 0.72979 | TCGA-HC-7745 | 1.88101989 |
| TCGA-YL-A8SB | 0.73451263 | TCGA-HC-8216 | 1.88952848 |
| TCGA-CH-5737 | 0.73515279 | TCGA-YL-A9WL | 1.90058589 |
| TCGA-G9-6347 | 0.73566992 | TCGA-EJ-7792 | 1.90489497 |
| TCGA-YL-A8S9 | 0.73834315 | TCGA-ZG-A9LY | 1.90783867 |
| TCGA-J9-A8CN | 0.74060746 | TCGA-KK-A6E7 | 1.91238523 |
| TCGA-ZG-A9L6 | 0.74245504 | TCGA-YL-A8HM | 1.92228919 |
| TCGA-KK-A8IJ | 0.74508519 | TCGA-KK-A8I4 | 1.93148794 |
| TCGA-YL-A9WI | 0.7509875 | TCGA-VN-A88R | 1.93206834 |
| TCGA-2A-A8VX | 0.75229237 | TCGA-V1-A9ZR | 1.97964494 |
| TCGA-G9-6369 | 0.75258174 | TCGA-J9-A52C | 1.98701332 |
| TCGA-EJ-5521 | 0.75612153 | TCGA-ZG-A9L9 | 2.00193165 |
| TCGA-V1-A8MG | 0.76166999 | TCGA-EJ-7785 | 2.00299354 |
| TCGA-CH-5788 | 0.76350212 | TCGA-ZG-A8QZ | 2.02507856 |
| TCGA-EJ-5515 | 0.76487735 | TCGA-ZG-A9M4 | 2.03004621 |
| TCGA-J4-A67L | 0.77817205 | TCGA-EJ-5502 | 2.07541758 |
| TCGA-EJ-A7NH | 0.78219069 | TCGA-VP-A87E | 2.07913609 |
| TCGA-J9-A8CP | 0.78425825 | TCGA-ZG-A9LZ | 2.09061238 |
| TCGA-QU-A6IO | 0.79492189 | TCGA-ZG-A9L2 | 2.11933916 |
| TCGA-2A-AAYF | 0.79761258 | TCGA-HC-7233 | 2.14898493 |
| TCGA-V1-A9OY | 0.80378157 | TCGA-HC-7817 | 2.15781002 |
| TCGA-VN-A88N | 0.80398641 | TCGA-YL-A9WH | 2.1645069 |
| TCGA-V1-A8MU | 0.81279723 | TCGA-EJ-7331 | 2.16478111 |
| TCGA-XK-AAJT | 0.81488586 | TCGA-EJ-5526 | 2.17358778 |
| TCGA-J4-8200 | 0.8155401 | TCGA-KK-A8I7 | 2.18291278 |
| TCGA-CH-5768 | 0.81683079 | TCGA-TK-A8OK | 2.20756698 |
| TCGA-EJ-7318 | 0.81885431 | TCGA-HC-7749 | 2.21909721 |
| TCGA-HC-A6HX | 0.81895814 | TCGA-KK-A59Z | 2.24076736 |
| TCGA-YL-A8HL | 0.82078815 | TCGA-VP-AA1N | 2.25741693 |
| TCGA-G9-6356 | 0.82373779 | TCGA-CH-5771 | 2.26871898 |
| TCGA-V1-A8ML | 0.82918868 | TCGA-ZG-A8QY | 2.28827539 |
| TCGA-KC-A7F3 | 0.83776849 | TCGA-YL-A8HJ | 2.29516365 |
| TCGA-J4-A67N | 0.84033411 | TCGA-EJ-5527 | 2.30161779 |
| TCGA-EJ-5499 | 0.84461604 | TCGA-HC-7210 | 2.32421358 |
| TCGA-VP-A875 | 0.85291744 | TCGA-EJ-7791 | 2.32559332 |
| TCGA-CH-5765 | 0.85423191 | TCGA-ZG-A9LM | 2.34198767 |
| TCGA-V1-A9OA | 0.85867064 | TCGA-J9-A52E | 2.38442043 |
| TCGA-G9-6364 | 0.86211797 | TCGA-XQ-A8TB | 2.38449842 |
| TCGA-EJ-A7NJ | 0.8662722 | TCGA-ZG-A9KY | 2.3851331 |
| TCGA-EJ-5532 | 0.86791989 | TCGA-EJ-7330 | 2.41809214 |
| TCGA-EJ-A7NN | 0.86836582 | TCGA-CH-5738 | 2.41998726 |
| TCGA-KK-A6E1 | 0.86930795 | TCGA-HC-8266 | 2.43066256 |
| TCGA-J4-A67S | 0.871363 | TCGA-YL-A8HK | 2.44684417 |
| TCGA-EJ-5510 | 0.87172939 | TCGA-KK-A7B4 | 2.44887986 |
| TCGA-HC-8257 | 0.87206225 | TCGA-KK-A8IC | 2.50547492 |
| TCGA-2A-AAYU | 0.87853154 | TCGA-YL-A8S8 | 2.53812359 |
| TCGA-G9-7525 | 0.88221691 | TCGA-CH-5739 | 2.53838577 |
| TCGA-YL-A8SR | 0.88568066 | TCGA-HC-A632 | 2.54684253 |
| TCGA-VN-A88O | 0.89586289 | TCGA-YL-A8SC | 2.55376161 |
| TCGA-EJ-7786 | 0.89958852 | TCGA-EJ-5495 | 2.56109333 |
| TCGA-CH-5789 | 0.90295643 | TCGA-G9-7523 | 2.59307611 |
| TCGA-HC-8265 | 0.90331931 | TCGA-XK-AAIV | 2.59669618 |
| TCGA-VP-A87D | 0.9046018 | TCGA-EJ-5525 | 2.61211403 |
| TCGA-J4-A83K | 0.90894747 | TCGA-V1-A9O7 | 2.65756622 |
| TCGA-HI-7170 | 0.90923309 | TCGA-CH-5752 | 2.6937846 |
| TCGA-2A-A8VO | 0.91135025 | TCGA-KK-A59V | 2.7212484 |
| TCGA-EJ-AB27 | 0.91443735 | TCGA-EJ-5522 | 2.74090717 |
| TCGA-EJ-5508 | 0.92833791 | TCGA-EJ-5509 | 2.76985748 |
| TCGA-KC-A4BV | 0.93270582 | TCGA-EJ-7782 | 2.80582702 |
| TCGA-HC-7078 | 0.93819637 | TCGA-V1-A8WW | 2.80741636 |
| TCGA-V1-A9Z8 | 0.94900107 | TCGA-FC-7961 | 2.81900896 |
| TCGA-EJ-5531 | 0.94911339 | TCGA-VP-A87C | 2.83976848 |
| TCGA-G9-6338 | 0.94942775 | TCGA-CH-5792 | 2.86690977 |
| TCGA-KC-A4BL | 0.95023437 | TCGA-HC-7081 | 2.88791307 |
| TCGA-EJ-A7NG | 0.95126863 | TCGA-HC-8260 | 2.94490447 |
| TCGA-EJ-5498 | 0.95525699 | TCGA-XK-AAJP | 2.94946128 |
| TCGA-HC-7232 | 0.95569925 | TCGA-ZG-A9MC | 2.97669671 |
| TCGA-HC-7742 | 0.95887561 | TCGA-EJ-5524 | 3.01056724 |
| TCGA-XK-AAIR | 0.96073091 | TCGA-EJ-7315 | 3.03713127 |
| TCGA-KK-A8I9 | 0.96333449 | TCGA-EJ-7327 | 3.1614095 |
| TCGA-TP-A8TT | 0.96486286 | TCGA-EJ-5518 | 3.42694782 |
| TCGA-HC-A8D0 | 0.9673138 | TCGA-V1-A9Z7 | 3.50330792 |
| TCGA-CH-5791 | 0.970676 | TCGA-HC-7748 | 3.72097874 |
| TCGA-J4-A83M | 0.97904765 | TCGA-CH-5751 | 3.72100971 |
| TCGA-ZG-A9NI | 0.98089413 | TCGA-YL-A9WY | 4.04833034 |
| TCGA-V1-A8WV | 0.98593849 | TCGA-ZG-A9L0 | 4.16413619 |
| TCGA-G9-6370 | 0.99784452 | TCGA-EJ-5514 | 4.33301313 |
| TCGA-SU-A7E7 | 0.99799731 | TCGA-J9-A8CL | 4.66859879 |
| TCGA-ZG-A8QX | 0.99906901 | TCGA-CH-5754 | 4.71564239 |
| TCGA-J4-AATZ | 1.00367606 | TCGA-HC-7079 | 5.02077372 |
| TCGA-CH-5740 | 1.00545185 | TCGA-HC-A9TH | 5.14556331 |
| TCGA-HC-7209 | 1.01037771 | TCGA-YL-A9WJ | 5.30808278 |
| TCGA-H9-A6BX | 1.01136387 | TCGA-CH-5761 | 5.63510631 |
| TCGA-J4-A83J | 1.0142055 | TCGA-G9-7521 | 5.93137872 |
| TCGA-KK-A7AZ | 1.01539631 | TCGA-HC-7821 | 7.58552476 |
|  |  | TCGA-4L-AA1F | 15.6382302 |
